# Supplementary material for: An N-heterocyclic carbene ligand promotes highly selective alkyne semihydrogenation with copper nanoparticles supported on passivated silica
Source: PubMed Central journal article supplement — Chem Sci. 2018 May 23;9(24):5366–71. doi: 10.1039/c8sc01924j (PMC6009536; doi:10.1039/c8sc01924j), 2018-05-23
Supplement: SC-009-C8SC01924J-s001.pdf [file SC-009-C8SC01924J-s001.pdf]

## Supporting Information

### An N-Heterocyclic Carbene Ligand Promotes Highly Selective Alkyne Hydrogenation on Copper Nanoparticles Supported on Passivated Silica

Nicolas Kaeffer,<sup>a</sup> Hsueh-Ju Liu,<sup>a,b</sup> Hung-Kun Lo,<sup>a</sup> Alexey Fedorov,<sup>a,\*</sup> Christophe Copéret<sup>a,\*</sup>

*a. ETH Zürich, Department of Chemistry and Applied Biosciences, Vladimir-Prelog-Weg 1-5, CH-8093, Zürich, Switzerland.*

*b. Present address: Department of Applied Chemistry, National Chiao Tung University, 1001 University Road, Hsinchu, 30010, Taiwan.*

E-mail:

\*fedoroa@ethz.ch

\*ccoperet@ethz.ch

#### **Abstract:**

*We report a surface organometallic route that generates copper nanoparticles (NPs) on a silica support while simultaneously passivating the silica surface with trimethylsilyloxy groups. The material is active for the catalytic semihydrogenation of phenylalkyl-, dialkyl- and diaryl-alkynes and displays high chemo- and stereoselectivity at full alkyne conversion to corresponding (Z)-olefins in the presence of a N-heterocyclic carbene (NHC) ligand. Solid-state NMR spectroscopy using the NHC ligand <sup>13</sup>C-labeled at the carbenic carbon reveals a genuine coordination of the carbene to Cu NPs. The presence of distinct Cu surface environments and the coordination of the NHC to specific Cu sites likely accounts for the increased selectivity.*

**DOI:** 10.1039/c8sc01924j

## Table of Contents

|                               |     |
|-------------------------------|-----|
| Experimental Procedures ..... | S2  |
| Results and Discussion .....  | S5  |
| References .....              | S13 |
| Author Contributions .....    | S13 |

## Experimental Procedures

### General Experimental Methods

Unless otherwise noted, all experiments were conducted with dry, oxygen-free solvents using standard Schlenk techniques or in N<sub>2</sub> or Ar-filled gloveboxes. Toluene and pentane were purified by passage through double solvent purification alumina columns (MBraun) and degassed prior to utilization. THF was distilled from purple Na/benzophenone and stored over 3 Å sieves. Benzene-*d*<sub>6</sub> was vacuum distilled from purple Na/benzophenone and stored over 3 Å sieves. Unless otherwise noted, reagents were obtained from commercial suppliers and used as received. 1-phenyl-propyne (**S1**), 1-phenyl-1-hexyne (**S2**), 1-phenyl-4-hexyne (**S3**) were dried under CaH<sub>2</sub>, vacuum-distilled, degassed by freeze-pump-thaw cycles and filtered over activated alumina pad before use. Diphenylacetylene (**S4**), 4-methoxydiphenylacetylene (**S5**), 4-chlorodiphenylacetylene (**S6**), 4-bromodiphenylacetylene (**S7**) were dried and degassed at 60 °C under high-vacuum (10<sup>-5</sup> mbar).

Synthetic procedures for 1,3-bis(2,4,6-trimethylphenyl)imidazol-2-ylidene (IMes) and its analogue <sup>13</sup>C-labeled at the carbenic carbon (IMes\*) were adapted from literature.<sup>1</sup> Passivated silica (SiO<sub>2-TMS</sub>) was prepared according to the literature procedure.<sup>2</sup>

### Characterization methods

Elemental analysis of the supported material was performed by the Mikroanalytisches Labor Pascher, Remagen, Germany. Liquid-state NMR spectra were recorded on a Bruker DPX-300 instrument operating at the denoted spectrometer frequency given in MHz for the specified nucleus. The <sup>1</sup>H and <sup>13</sup>C chemical shifts are calibrated with the residual solvent peak. Solid-state NMR spectra were recorded under MAS conditions on Bruker Advance III 400 spectrometer with conventional triple resonance 4 mm CP-MAS probe. Samples were introduced in zirconia rotors inside a glovebox. Spinning rate was set to 10 kHz, <sup>13</sup>C CP-MAS spectra were recorded using a contact time of 2 ms unless otherwise noted and <sup>13</sup>C HP-DEC spectra were recorded using a baseline-subtraction sequence to subtract residual signals from the probe. Electron microscopy was performed at the ScopeM facilities, ETH Zürich. Infrared (IR) spectra were recorded using a Bruker FT-IR Alpha spectrometer placed in the glovebox, equipped with OPUS software, and using 275-7500 spectral range, resolution < 2 cm<sup>-1</sup>, RockSolid interferometer, DTGS (triglycine sulphate) detector and SiC globar source. IR spectra with added gases were recorded on a Nicolet 550-FT spectrometer by using an infrared *in situ* cell equipped with CaF<sub>2</sub> windows. Typically, 32 scans were accumulated for each spectrum (resolution < 2 cm<sup>-1</sup>). Gas chromatography (GC) analysis were performed on Shimadzu-QP 2010 Ultra equipped with FID and MS detectors using an HP-5 column, N<sub>2</sub> as a carrier gas (30 mL·min<sup>-1</sup>) and the following temperature programs: ramp of 10 °C·min<sup>-1</sup> from 60 °C to 110 °C, plateau at 110 °C for 1 min, ramp of 40 °C·min<sup>-1</sup> from 110 °C to 250 °C, plateau at 250 °C for 11 min or ramp of 20 °C·min<sup>-1</sup> from 70 °C to 100 °C, plateau at 100 °C for 1 min, ramp of 40 °C·min<sup>-1</sup> from 100 °C to 200 °C, ramp of 10 °C·min<sup>-1</sup> from 200 °C to 260 °C, plateau at 260 °C for 8 min. Concentrations in substrates and products were determined assuming the same response factors for an alkyne and its respective alkenes and alkane. H<sub>2</sub> chemisorption was performed using a Belsorp-Max (BEL Japan, Inc.) instrument. Approximately 100 mg the sample were loaded into cells in an Ar-filled glovebox. H<sub>2</sub> adsorption experiments were recorded 25 °C under isothermal conditions using a bath regulated by a Julabo GF40 circulating thermostat.

Quick X-ray absorption spectroscopy at the Cu K-edge was measured at the SuperXAS beamline at the Swiss Light Source (SLS; Paul Scherrer Institute, Villigen, Switzerland). The SLS is a third-generation synchrotron operating at a 2.4 GeV electron energy and a current of 400 mA. The incident beam was collimated by a Si-coated mirror at 2.8 mrad, monochromatized using a double crystal Si(111) monochromator, and focused with an Rh-coated toroidal mirror (at 2.8 mrad) down to 100 × 100 μm with a beam intensity of 4-5 × 10<sup>11</sup> ph·s<sup>-1</sup>. Samples were pressed into wafers in a glovebox and sealed in Kapton tape. XAS spectra were collected in the transmission mode using ion chambers filled with He-N<sub>2</sub> gas mixtures. Multiple X-ray adsorption scans (8820 - 10000 eV) were averaged with a scan time of 5 min. All spectra were calibrated with respect to the spectrum of a Cu reference foil recorded simultaneously by setting the first inflexion point to 8979 eV (Cu K-edge).

### Catalytic Tests

**Procedure #1.** Hydrogenation reactions with monitoring of the H<sub>2</sub> uptake.

Kinetic studies were performed on an Endeavour 8-reactor autoclave (Biotage) operated inside a glovebox. The pressure is referenced to atmospheric pressure. The H<sub>2</sub> feed was passed through activated Cu/Al<sub>2</sub>O<sub>3</sub> sorbent (BASf) and activated 4-Å molecular sieves. Stock

solutions of substrate **S1** in toluene (1 M) and of ligands in toluene (10 and 100 mM) were prepared using volumetric flasks. In a typical experiment, 20.0 mg of material **1** (7.3  $\mu\text{mol Cu}_{\text{total}}$ ) were loaded in glass liners, appropriate volumes of 1 M **S1** solution (400  $\mu\text{L}$ , 400  $\mu\text{mol}$ ) and optionally of ligand solution added using a micropipette and toluene added to make the total volume of 4 mL. The liners were then placed in the 8-port autoclave and purged 5 times with  $\text{H}_2$  (25 bars). The reaction media were stirred at 500 rpm and set to a pressure of 20 bars  $\text{H}_2$  and a temperature of 60  $^\circ\text{C}$ . Reactions were performed under *quasi*-isobaric conditions.  $\text{H}_2$  consumption data were recorded using the Endeavour Advanced software.

At the end of the catalytic run, 200  $\mu\text{L}$  aliquots were sampled from all reactors into GC vials, 200  $\mu\text{L}$  of GC standard solution (tridecane 10 mM) added into each vial and the mixtures analyzed by GC. Areas of GC peaks were normalized against the area of the tridecane peak. Final concentrations in substrates and products were determined from normalized areas using a GC calibration.  $\text{H}_2$  consumption profiles were normalized using final concentrations in substrates.

**Procedure #2.** Hydrogenation reactions for substrate screening.

The procedure is identical to procedure #1, with the following alteration:

Stock solutions of substrates in toluene (100 mM) were prepared. 10.0 mg of material **1** (3.6  $\mu\text{mol Cu}_{\text{total}}$ ) were loaded in glass liners, 420  $\mu\text{L}$  of substrate solution (42  $\mu\text{mol}$ ) and optionally 84  $\mu\text{L}$  of 10 mM IMes solution (0.84  $\mu\text{mol}$ ) were added using a micropipette. Toluene was then added to make the total volume of 4.2 mL. The reaction media were stirred at 500 rpm and set to a pressure of 20 bars  $\text{H}_2$  and a temperature of 60  $^\circ\text{C}$  for 24h. At the beginning and the end of the hydrogenation runs, 200  $\mu\text{L}$  aliquots were drawn from all reactors into GC vials, 200  $\mu\text{L}$  of GC standard solution (tridecane 50 mM) added into each vial, and the mixtures analyzed by GC. Areas of GC peaks normalized against the area of the tridecane peak provide conversion and selectivities in hydrogenation and side products. At the end of the hydrogenation runs, 400  $\mu\text{L}$  aliquots were sampled from all reactors into NMR tubes, mixed with 200  $\mu\text{L}$   $\text{C}_6\text{D}_6$  and analyzed by  $^1\text{H}$  NMR spectroscopy to identify the isomeric nature of the formed alkenes.

**Procedure #3.** Hydrogenation reactions including internal standard.

The procedure is identical to procedure #1, with the following alterations:

In addition to solutions of a ligand and 1-phenyl-1-propyne, 1 mL of internal GC standard solution (10 mM tridecane) was introduced to the liners. At the beginning and the end of the hydrogenation runs, 400  $\mu\text{L}$  aliquots were sampled from all reactors into GC vials and analyzed by GC. Areas of GC peaks normalized against the area of the tridecane peak provide conversion and selectivities in hydrogenation and side products.

**Procedure #4.** Hydrogenation of (Z)-**S1**<sub>2H</sub>.

The procedure is identical to procedure #1, with the following alterations:

5 mg of material **1** (1.8  $\mu\text{mol Cu}_{\text{total}}$ ) were loaded in glass liners and 2 mL of a 200 mM toluene solution of (Z)-**S1**<sub>2H</sub> (400  $\mu\text{mol}$ ) containing GC standard tridecane (200  $\mu\text{mol}$ ) and optionally a ligand (8  $\mu\text{mol}$ ) was added. The reaction media were stirred at 500 rpm and set to desired pressures and temperatures. At the beginning and the end of the hydrogenation runs, 400  $\mu\text{L}$  aliquots were sampled from all reactors into GC vials and analyzed by GC. Areas of GC peaks normalized against the area of the tridecane peak provide conversion and selectivities in hydrogenation and side products.

## Synthetic procedures

### [Cu<sub>4</sub>(HMDS)<sub>4</sub>]

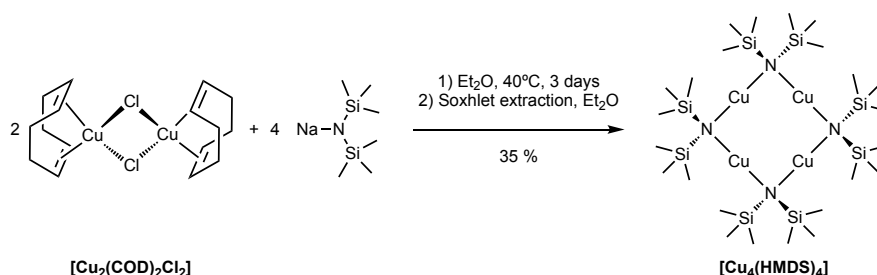

**Scheme S1.** Synthesis of [Cu<sub>4</sub>(HMDS)<sub>4</sub>].

2.5 g [Cu<sub>2</sub>(COD)<sub>2</sub>Cl<sub>2</sub>] (5.3 mmol, 1.0 equiv.) were suspended in 80 mL Et<sub>2</sub>O. 2.1 g NaHMDS (11.5 mmol, 2.2 equiv.) were added to the suspension and the mixture stirred at room temperature for 3 days. The greyish suspension was filtered and the precipitate extracted in Et<sub>2</sub>O using a Soxhlet apparatus to yield the desired complex (yield: 39%, 910 mg).

<sup>1</sup>H NMR (CDCl<sub>3</sub>, 300 MHz): δ (ppm) 0.35 (s). <sup>13</sup>C NMR (CDCl<sub>3</sub>, 75 MHz): δ (ppm) 7.96.

**E.A.:** calcd for C<sub>6</sub>H<sub>18</sub>NSi<sub>2</sub>Cu: C, 32.18; H, 8.10; N, 6.25; found: C, 31.99; H, 7.93; N, 6.06.

### SiO<sub>2-700</sub>

SiO<sub>2-700</sub> was prepared by calcination of compacted Aerosil Degussa (206 m<sup>2</sup>·g<sup>-1</sup>) in a flow reactor under a stream of synthetic air (80 mL·min<sup>-1</sup>) with the following temperature program: from R.T. to 700 °C at 300 °C·h<sup>-1</sup>; 700 °C for 12 h.

Titration with [Mg(Bn)<sub>2</sub>(THF)<sub>2</sub>]: 0.34 mmol<sub>SiOH</sub>·g<sup>-1</sup>; 0.99 OH·nm<sup>-1</sup>.

### [Cu<sub>4</sub>(HMDS)<sub>4</sub>]/SiO<sub>2-TMS</sub>

[Cu<sub>4</sub>(HMDS)<sub>4</sub>] (160 mg, 0.72 mmol<sub>Cu</sub>, 2.1 Cu equiv.) was dissolved in 10 mL of warm THF (60 °C). 1.0 g SiO<sub>2-700</sub> (0.34 mmol<sub>SiOH</sub>, 1 equiv.) was added and the reaction medium stirred at 60 °C and 120 rpm for 24 h. The supernatant was removed, the material washed 3 times with warm THF (5 ml) and dried under high vacuum to afford a white solid (815 mg).

**E.A.** (wt%): Cu, 2.12; C, 1.81; H, 0.29; N, 0.26.

### Cu/SiO<sub>2-TMS</sub> (1)

[Cu<sub>4</sub>(HMDS)<sub>4</sub>]/SiO<sub>2-TMS</sub> was charged into a flow glass reactor and submitted to the following treatment: under H<sub>2</sub> flow from R.T. to 300 °C at 30 °C·h<sup>-1</sup> then at 300 °C for 12 h and under high-vacuum at 300 °C for 4 h. A dark red solid is obtained (720 mg).

**E.A.** (wt%): Cu, 2.31; C, 0.89; H, 0.17; N < 0.4.

### IMes\*-Cu/SiO<sub>2-TMS</sub> (2\*)

Cu/SiO<sub>2-TMS</sub> (120 mg, 2.8 mg Cu, 44 μmol Cu) was suspended in 5 mL toluene and 15 mg of IMes\* (49 μmol) were added to the suspension. The reaction mixture was stirred at room temperature and 120 rpm for 2 days. The mixture was allowed to decant, the supernatant removed. The material was washed twice with toluene, once with pentane (5 ml and 5 ml, respectively) and then dried under vacuum.

**E.A.** (wt%): Cu, 1.82; C, 3.37; H, 0.48; N, 0.44.

### IMes-Cu/SiO<sub>2-TMS</sub> (2)

Non-labeled IMes was coordinated to Cu/SiO<sub>2-TMS</sub> according to the same procedure as for IMes\*-Cu/SiO<sub>2-TMS</sub>.

### IMes\*/SiO<sub>2-TMS</sub>

SiO<sub>2-TMS</sub> (120 mg) was suspended in 5 mL of toluene and 15 mg IMes\* (49 μmol) were added to the suspension. The reaction mixture was stirred at room temperature and 120 rpm for 1 day. The mixture was allowed to decant, the supernatant removed. The material was washed twice with toluene and once with pentane (5 mL and 5 mL, respectively), then dried under vacuum.

### IMes\*/SiO<sub>2-700</sub>

SiO<sub>2-700</sub> (180 mg) was suspended in 5 mL of toluene and 15 mg IMes\* (49 μmol) were added to the suspension. The reaction mixture was stirred at room temperature and 120 rpm for 1 day. The mixture was allowed to decant, the supernatant removed. The material was washed twice with toluene and once with pentane (5 mL and 5 mL, respectively), then dried under vacuum.

## Results and Discussion

### Characterization of **1**

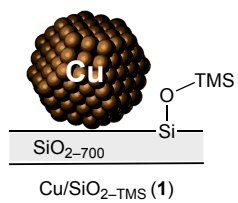

Scheme S2. Material **1**.

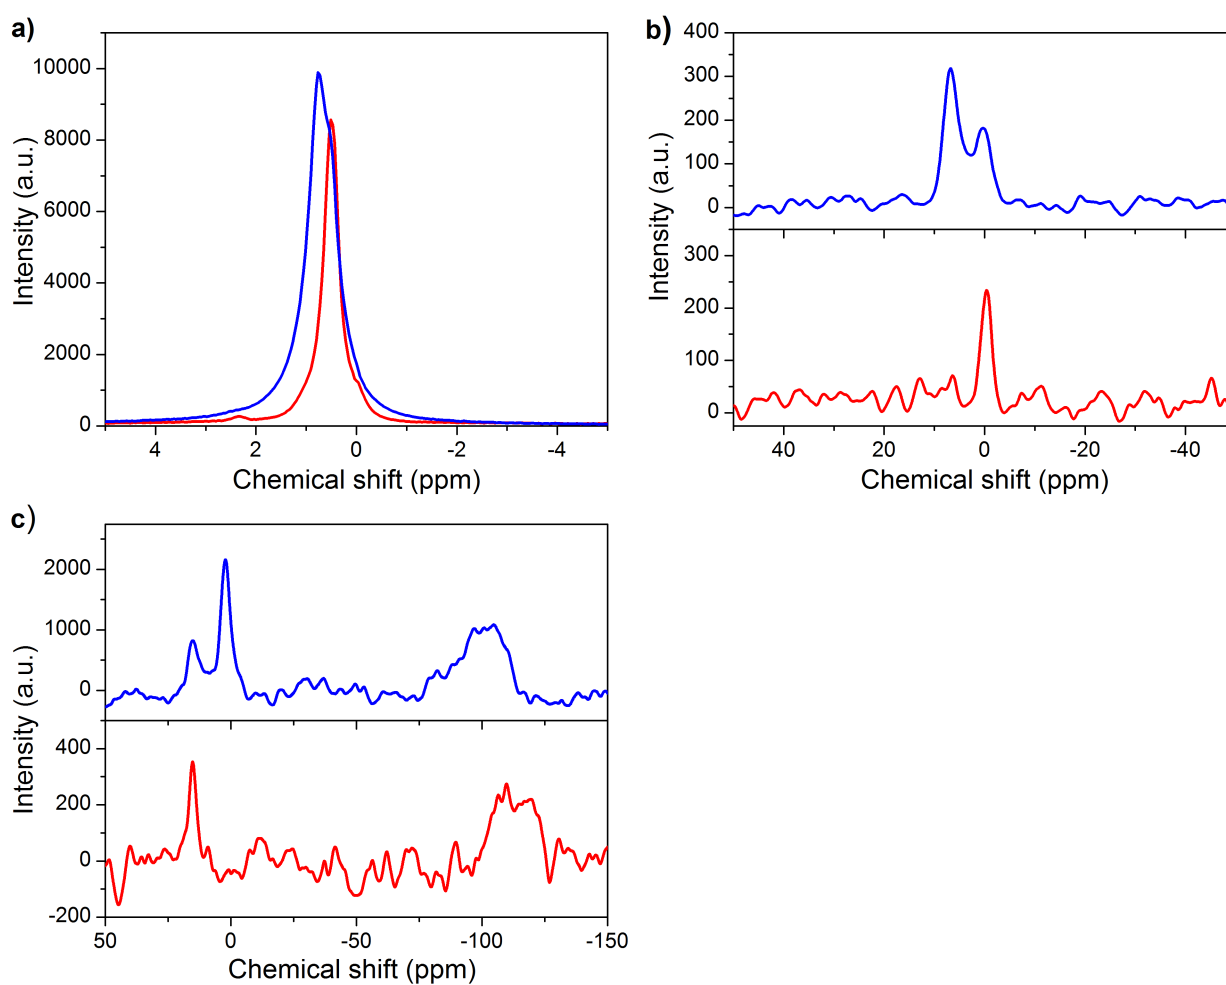

Figure S1. MAS  $^1\text{H}$  (16 scans) (a), CP-MAS  $^{13}\text{C}$  (16000 scans) (b) and CP-MAS  $^{29}\text{Si}$  (40000 scans) (c) solid-state NMR spectra of  $[\text{Cu}_{\text{HMDs}}]/\text{SiO}_2\text{-TMS}$  (blue) and **1** (red).

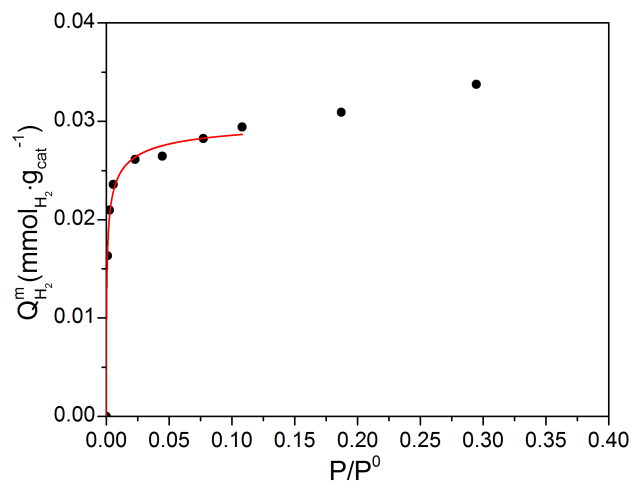

**Figure S2.** H<sub>2</sub> adsorption isotherm of **1** at 25 °C (dots) with the respective Langmuir dissociative adsorption isotherm fit (line).

H<sub>2</sub> chemisorption curve was fitted with the following Langmuir dissociative adsorption isotherm:

$$Q_{H_2}(P) = Q_{H_2}^{max} \cdot \frac{\sqrt{K_{H_2} \frac{P}{P^0}}}{1 + \sqrt{K_{H_2} \frac{P}{P^0}}} \quad \text{Equation S1}$$

where  $Q_{H_2}$ ,  $Q_{H_2}^{max}$  are coverage and maximal coverage in H<sub>2</sub>, respectively,  $P$  and  $P^0$  are partial and standard (1 bar) pressure in H<sub>2</sub> and  $K_{H_2}$  the adsorption equilibrium constant for H<sub>2</sub>.

The adsorption equilibrium constant was found at  $K_{H_2} = 1430 \pm 285$ . The maximal surface coverage in H<sub>2</sub> was found at  $Q_{H_2}^{max} = 0.03 \text{ mmol}_{H_2} \cdot g_{cat}^{-1}$ , giving a coverage in Cu surface sites of ca  $0.07 \text{ mmol}_{Cu_{surface}} \cdot g_{cat}^{-1}$ .

## Catalytic Results

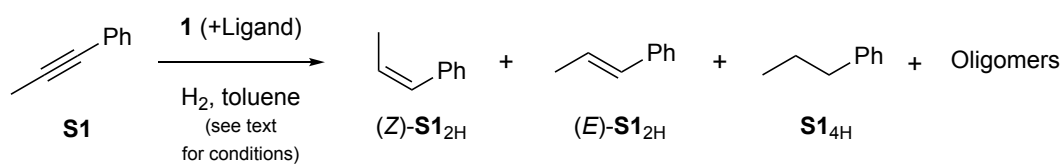

**Scheme S3.** Hydrogenation of **S1** over catalyst **1** in the presence or absence of ligand.

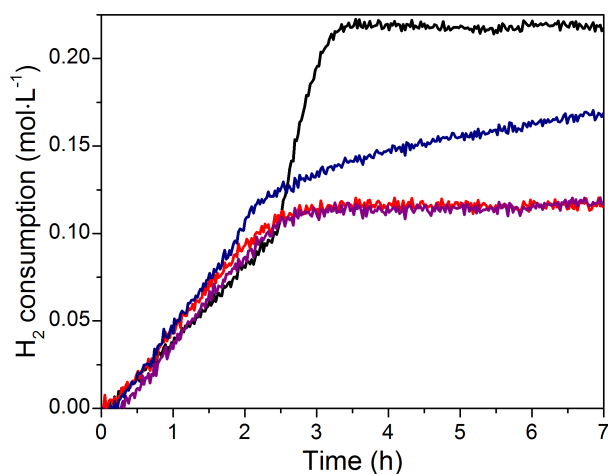

**Figure S3.**  $\text{H}_2$  consumption profile for hydrogenation of **S1** at 20 bar and 60 °C over catalyst **1** in the absence of ligand (black) or in the presence of IMes/**S1** ratios of 1:50 (red), 1:100 (purple) and 1:500 (navy) according to procedure #1.

**Table S1.** Hydrogenation of **S1** according to procedure #3.

| Entry | Catalyst | Ligand           | Ligand/ <b>S1</b> | P (bar) | T (°C) | Time (h) | Conversion (%) | Selectivity <b>S1</b> <sub>2H</sub> (%) (Z/E) | Selectivity <b>S1</b> <sub>4H</sub> (%) | Selectivity others (%) |
|-------|----------|------------------|-------------------|---------|--------|----------|----------------|-----------------------------------------------|-----------------------------------------|------------------------|
| 1     | <b>1</b> | None             | –                 | 20      | 60     | 8        | >99            | <1                                            | 98                                      | 2                      |
| 2     | <b>1</b> | IMes             | 1:50              | 20      | 60     | 8        | 98             | <b>97 (99:1)</b>                              | 2                                       | 1                      |
| 3     | <b>1</b> | PCy <sub>3</sub> | 1:50              | 20      | 60     | 8        | 99             | <b>92 (99:1)</b>                              | 2                                       | 4                      |
| 4     | None     | None             | –                 | 20      | 60     | 8        | 1              | <1                                            | <1                                      | >99                    |

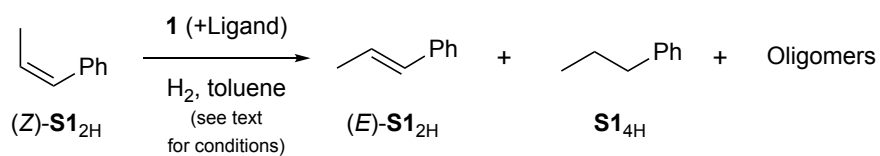

**Scheme S4.** Hydrogenation of (Z)-S1<sub>2H</sub> over catalyst **1** in the presence or absence of ligand.

**Table S2.** Hydrogenation of (Z)-S1<sub>2H</sub> over catalyst **1** according to procedure #4.

| Entry | Ligand           | P (bar) | T (°C) | Time (h) | Conversion (%) | Selectivity (E)-S1 <sub>2H</sub> (%) | Selectivity S1 <sub>4H</sub> (%) |
|-------|------------------|---------|--------|----------|----------------|--------------------------------------|----------------------------------|
| 1     | None             | 5       | 60     | 2        | 100            | <1                                   | 99                               |
| 2     | PCy <sub>3</sub> | 5       | 60     | 2        | 15             | 32                                   | 39                               |
| 3*    | PCy <sub>3</sub> | 5       | 100    | 2        | 33             | 27                                   | 44                               |
| 4     | IMes             | 5       | 60     | 2        | 1              | <1                                   | 99                               |
| 5*    | IMes             | 5       | 100    | 2        | 17             | 23                                   | 64                               |
| 6     | None             | 10      | 60     | 2        | 100            | <1                                   | 99                               |
| 7     | PCy <sub>3</sub> | 10      | 60     | 2        | 18             | 32                                   | 47                               |
| 8     | IMes             | 10      | 60     | 2        | 1              | <1                                   | 99                               |

\* After collecting an aliquot for GC analysis, runs from entries 2 and 4 were continued for additional 2 h at 60 °C followed by 2 h at 100 °C.



## Characterization of **2** and **2\***

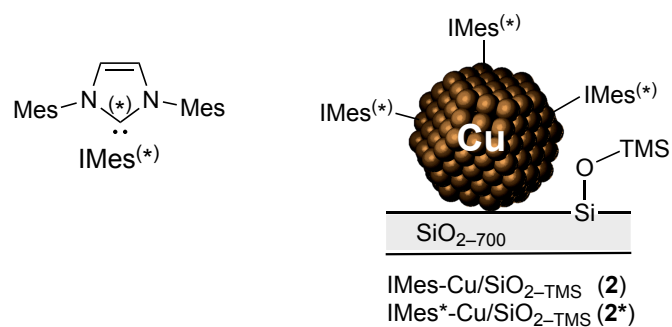

Scheme S5. Ligand  $\text{IMes}^{\text{*}}$ , materials **2** and **2\***.

Table S3. Elemental analyses.

| Compound | <b>1</b>                                                                              |                                                                                          | <b>2*</b>                                                                             |                                                                                          | Difference ( <b>2*</b> - <b>1</b> )                                                      |                           | $\text{IMes}^{\text{*}}$  |
|----------|---------------------------------------------------------------------------------------|------------------------------------------------------------------------------------------|---------------------------------------------------------------------------------------|------------------------------------------------------------------------------------------|------------------------------------------------------------------------------------------|---------------------------|---------------------------|
| Element  | Mass/mass loading<br>( $\text{g}_{\text{element}} \cdot \text{g}_{\text{cat}}^{-1}$ ) | Molar/mass loading<br>( $\text{mol}_{\text{element}} \cdot \text{g}_{\text{cat}}^{-1}$ ) | Mass/mass loading<br>( $\text{g}_{\text{element}} \cdot \text{g}_{\text{cat}}^{-1}$ ) | Molar/mass loading<br>( $\text{mol}_{\text{element}} \cdot \text{g}_{\text{cat}}^{-1}$ ) | Molar/mass loading<br>( $\text{mol}_{\text{element}} \cdot \text{g}_{\text{cat}}^{-1}$ ) | Molar ratios<br>(C, H, N) | Molar ratios<br>(C, H, N) |
| C        | $0.89 \cdot 10^{-2}$                                                                  | $7.4 \cdot 10^{-4}$                                                                      | $3.37 \cdot 10^{-2}$                                                                  | $2.80 \cdot 10^{-3}$                                                                     | $2.06 \cdot 10^{-3}$                                                                     | <b>0.38</b>               | <b>0.44</b>               |
| H        | $0.17 \cdot 10^{-2}$                                                                  | $1.7 \cdot 10^{-3}$                                                                      | $0.48 \cdot 10^{-2}$                                                                  | $4.8 \cdot 10^{-3}$                                                                      | $3.1 \cdot 10^{-3}$                                                                      | <b>0.57</b>               | <b>0.51</b>               |
| N        | n.d. (<0.4)                                                                           | n.d.                                                                                     | $0.44 \cdot 10^{-2}$                                                                  | $3.1 \cdot 10^{-4}$                                                                      | $3.1 \cdot 10^{-4}$ *                                                                    | <b>0.05</b>               | <b>0.04</b>               |

\* N loading in **1** taken as 0.

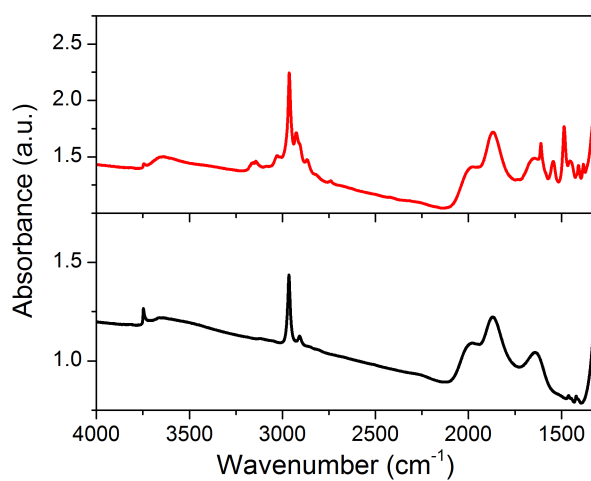

Figure S4. FTIR spectra of **1** (black) and **2** (red).

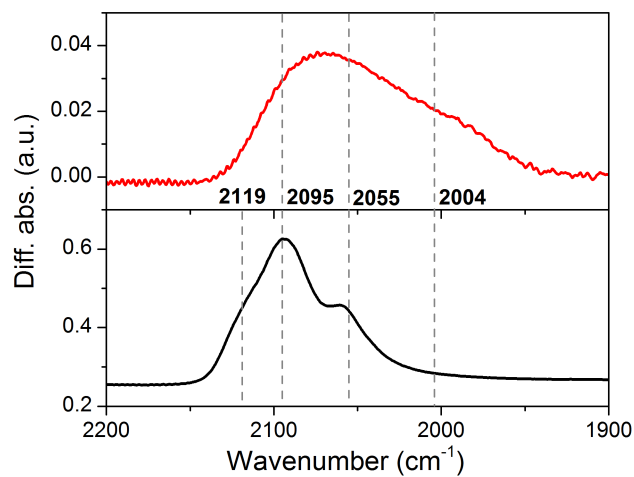

Figure S5. FTIR differential spectra after contacting CO with **1** at 33 mbar (black) and **2** at 28 mbar (red).

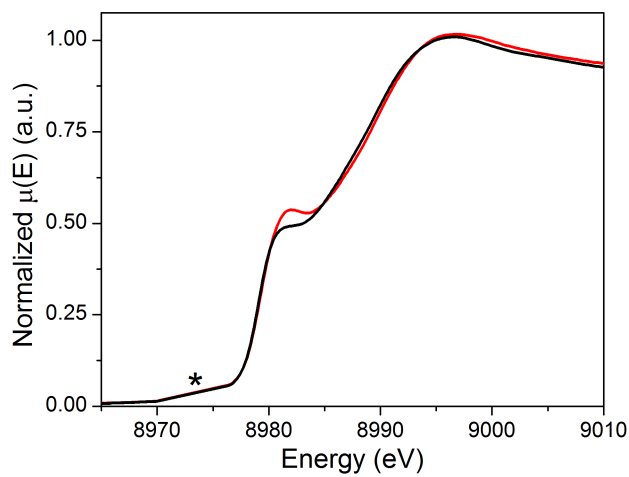

Figure S6. XANES spectra of **1** (black) and **2** (red). \*Region between 8970 and 8977 was deglitched.

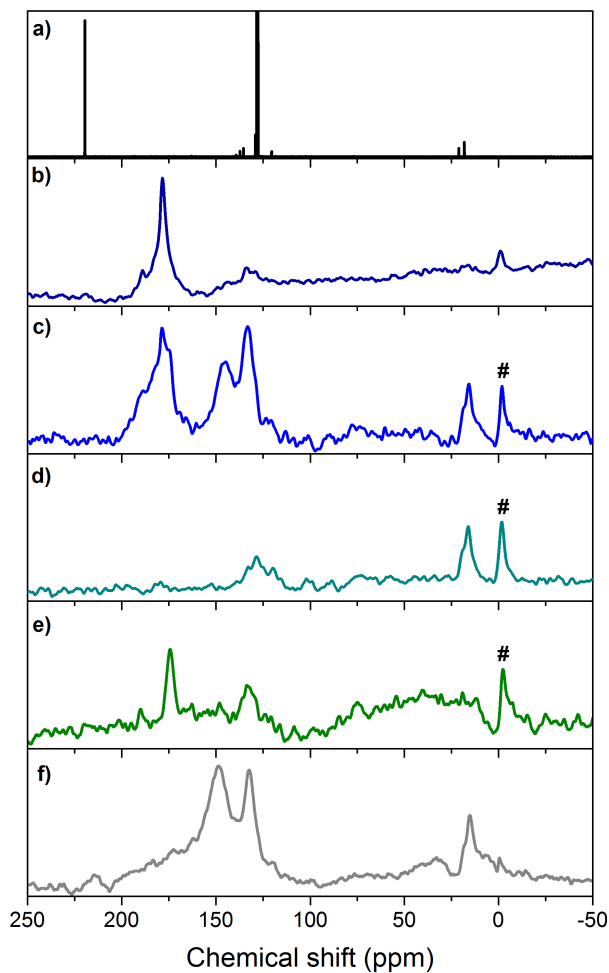

**Figure S7.** (a)  $^{13}\text{C}$  NMR solution-state spectrum of free IMes\* ( $\text{C}_6\text{D}_6$ , 75 MHz); (b)  $^{13}\text{C}$  NMR solid-state HPDEC spectrum of  $2^*$  (30000 scans);  $^{13}\text{C}$  NMR solid-state CP-MAS spectra of (c)  $2^*$  (90000 scans), (d)  $2$  (90000 scans), (e) IMes\*/ $\text{SiO}_2\text{-TMS}$  (27513 scans), (f) IMes\*/ $\text{SiO}_2\text{-700}$  (64000 scans).  $^{13}\text{C}$  NMR solid-state CP-MAS spectra of  $2^*$ ,  $2$  and IMes\*/ $\text{SiO}_2\text{-TMS}$  are normalized versus signals of the TMS groups of the support (#).

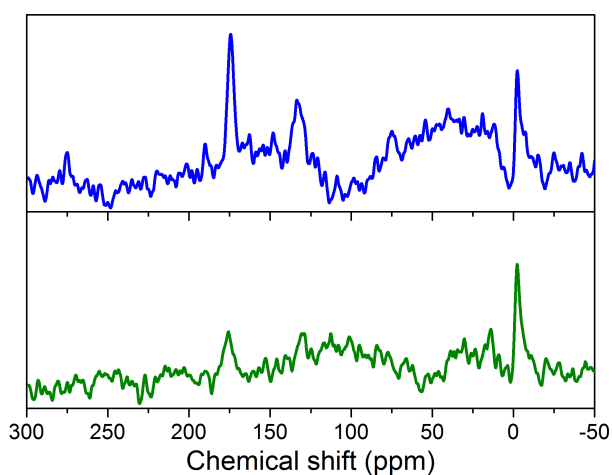

**Figure S8.**  $^{13}\text{C}$  solid-state MAS spectra of IMes\*/ $\text{SiO}_2\text{-TMS}$  in CP-MAS (27513 scans) (blue) and HPDEC (64788 scans) (green) modes.

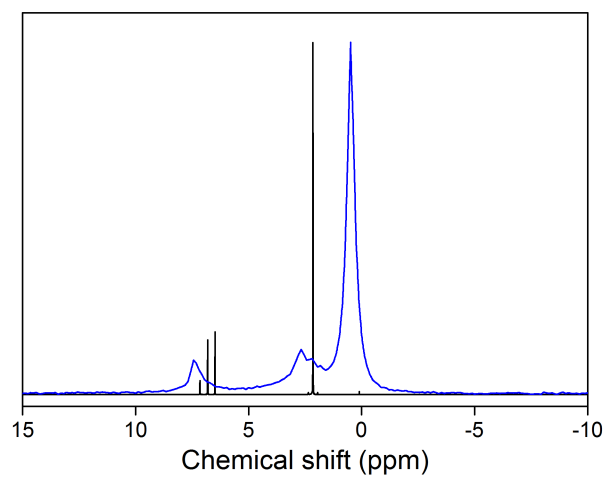

**Figure S9.** <sup>1</sup>H NMR solution-state spectrum of free IMes\* (C<sub>6</sub>D<sub>6</sub>, 300 MHz) (black) and <sup>1</sup>H NMR solid-state MAS spectra of 2\* (32 scans) (blue).

## References

1. L. Jafarpour, E. D. Stevens and S. P. Nolan, *J. Organomet. Chem.*, 2000, 606, 49-54.
2. D. P. Estes, G. Siddiqi, F. Allouche, K. V. Kovtunov, O. V. Safonova, A. L. Trigub, I. V. Koptug and C. Coperet, *J. Am. Chem. Soc.*, 2016, 138, 14987-14997.
3. K. Larmier, S. Tada, A. Comas-Vives and C. Coperet, *J. Phys. Chem. Lett.*, 2016, 7, 3259-3263.

## Author Contributions

N. K., A.F., and C.C. designed research; N. K., H.-J.L., and H-K. L. performed research; all authors analysed the data; N. K., A.F., and C.C. wrote the paper.
